# Supplementary figures and images for: Single-cell chromatin accessibility profiling of glioblastoma identifies an invasive cancer stem cell population associated with lower survival
Source: eLife journal article supplement (doi:10.7554/elife.64090), 2021-01-11

Figure 2-figure supplement 1

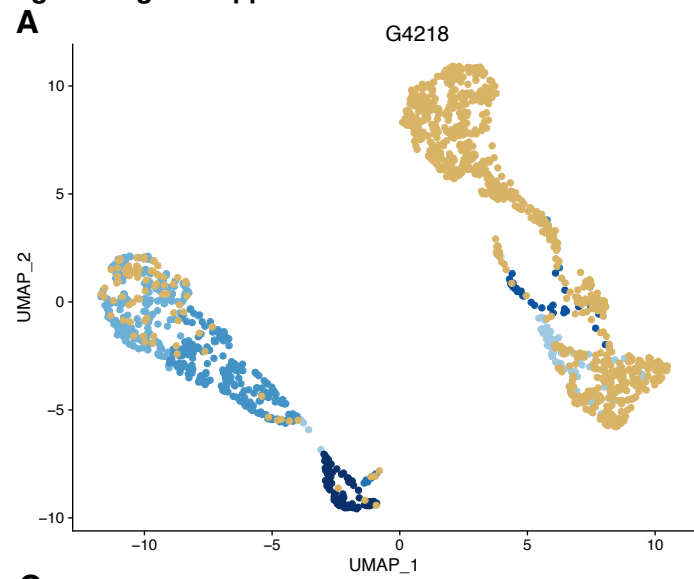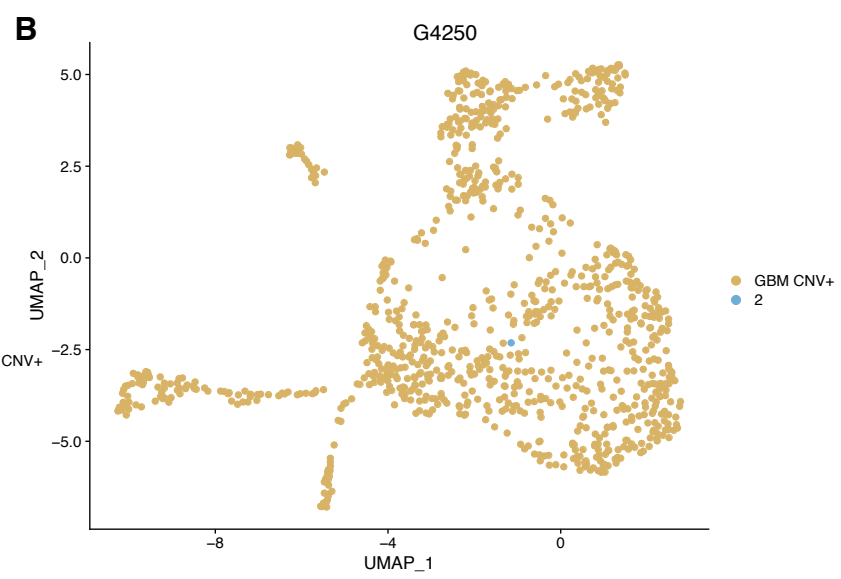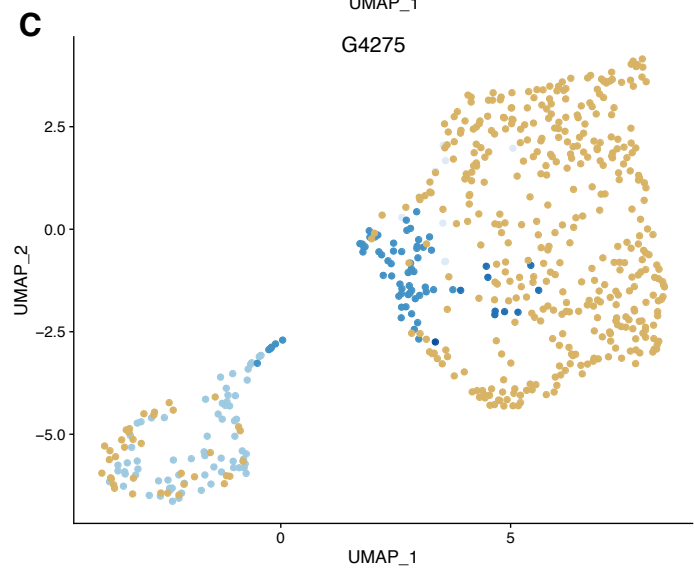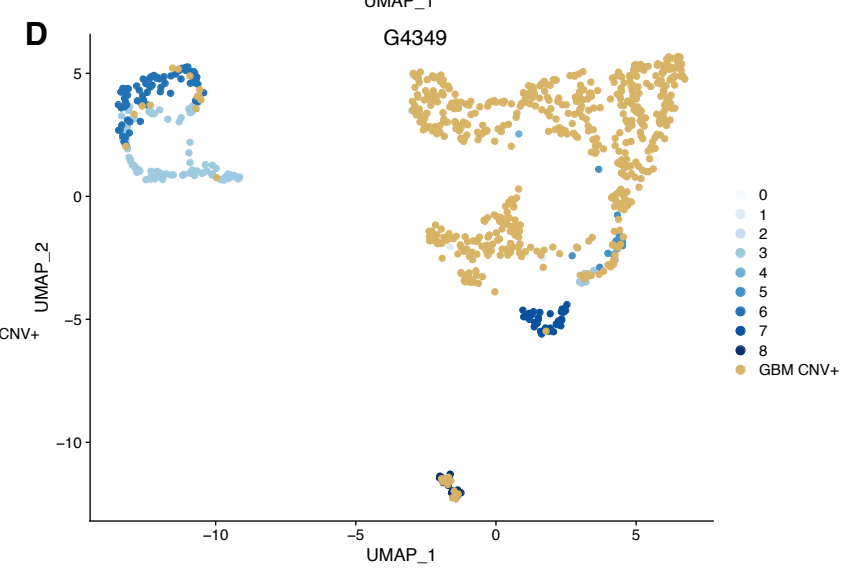

Supplement: supp [file elife-64090-supp-v1.zip]

Figure 5-figure supplement 2

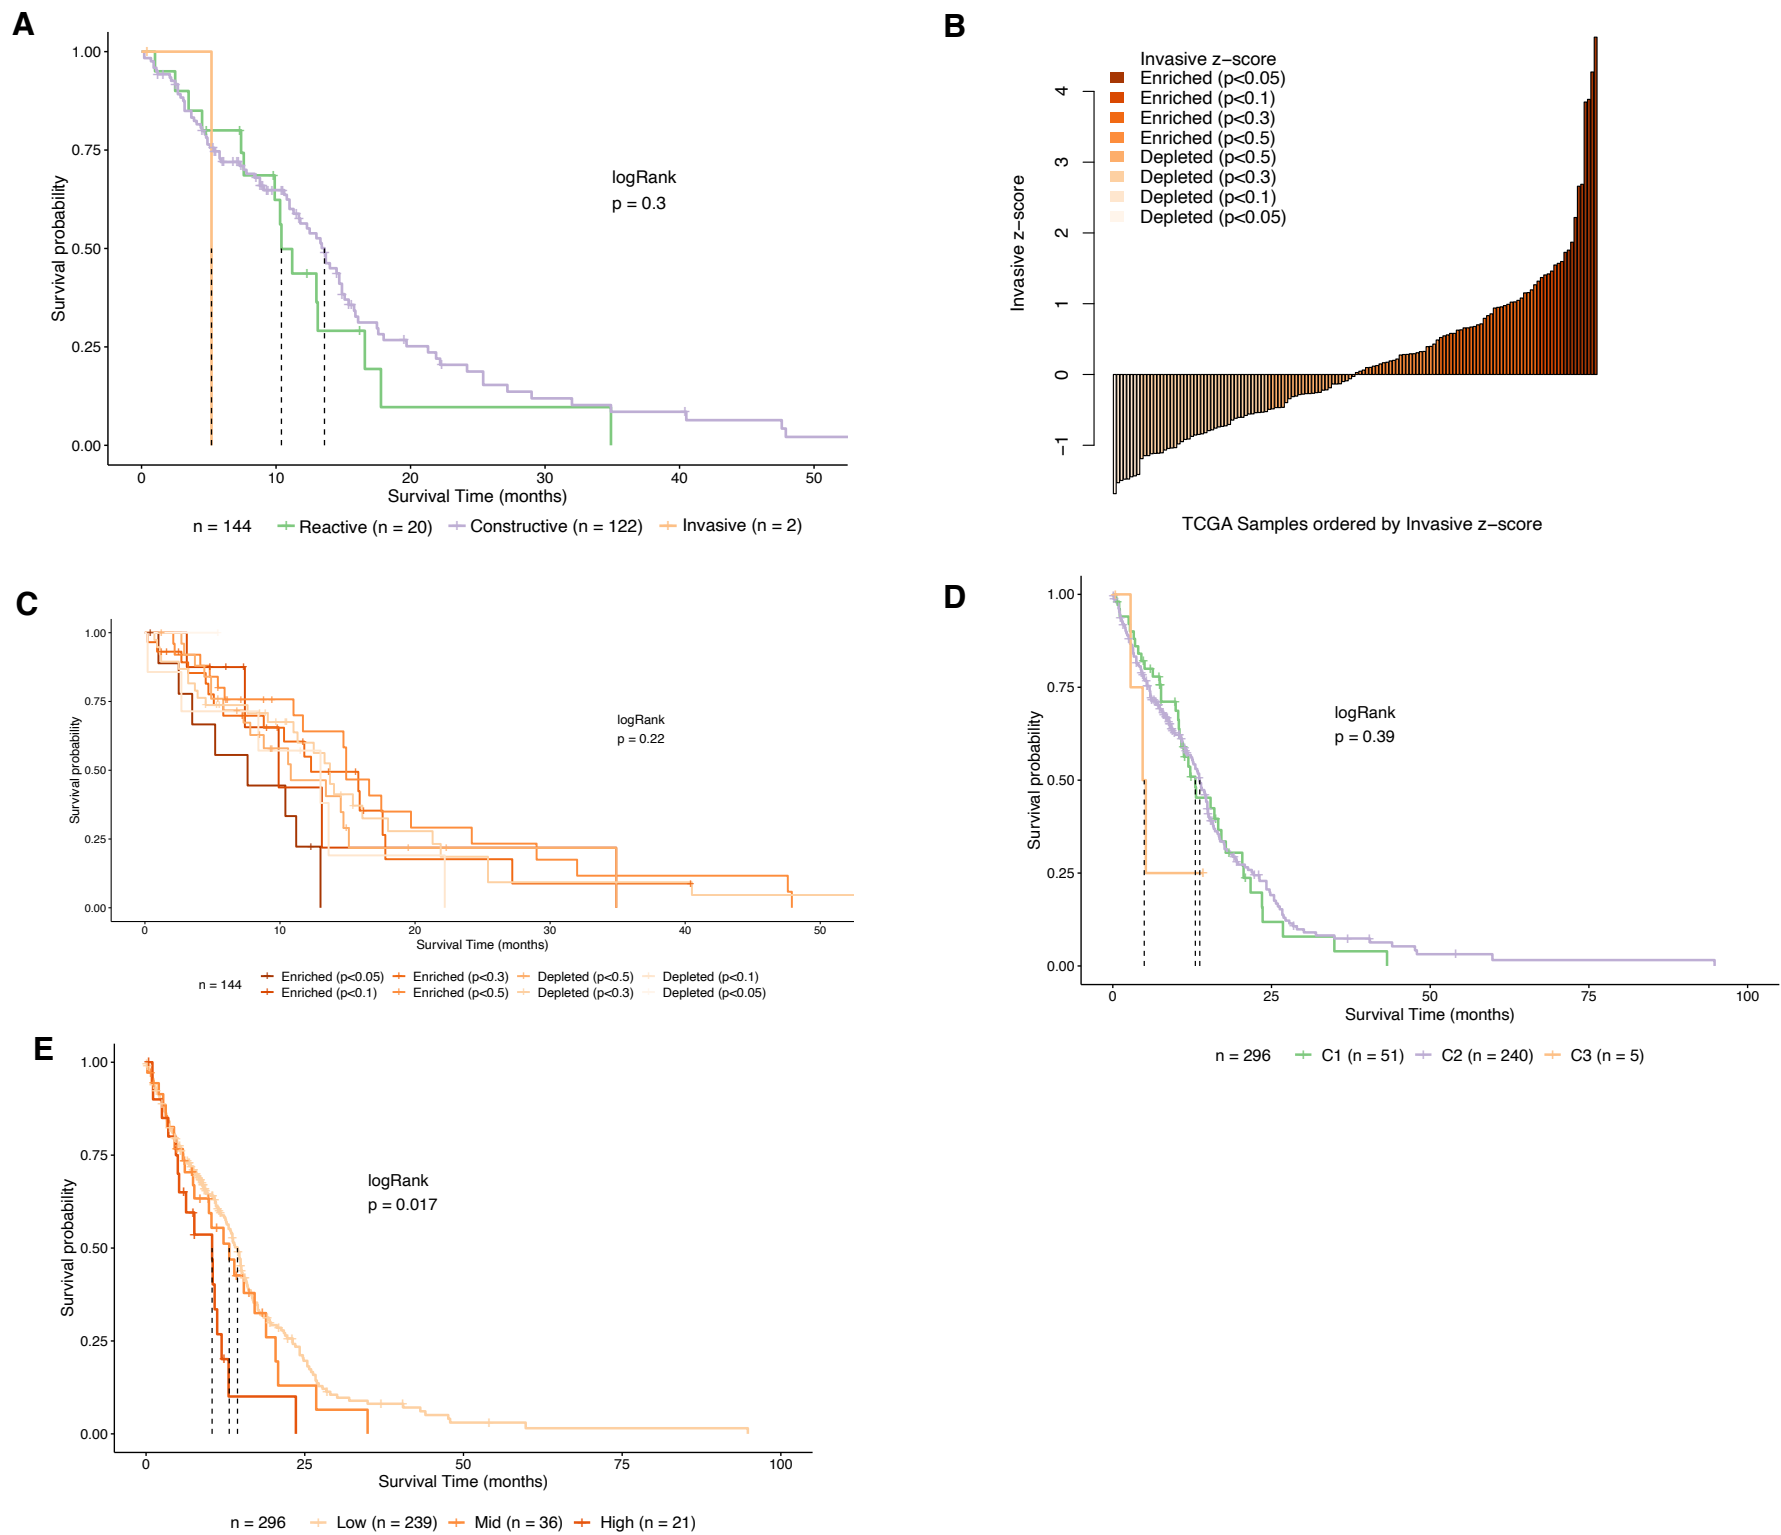

Supplement: supp [file elife-64090-supp-v1.zip]

Figure 3-figure supplement 1

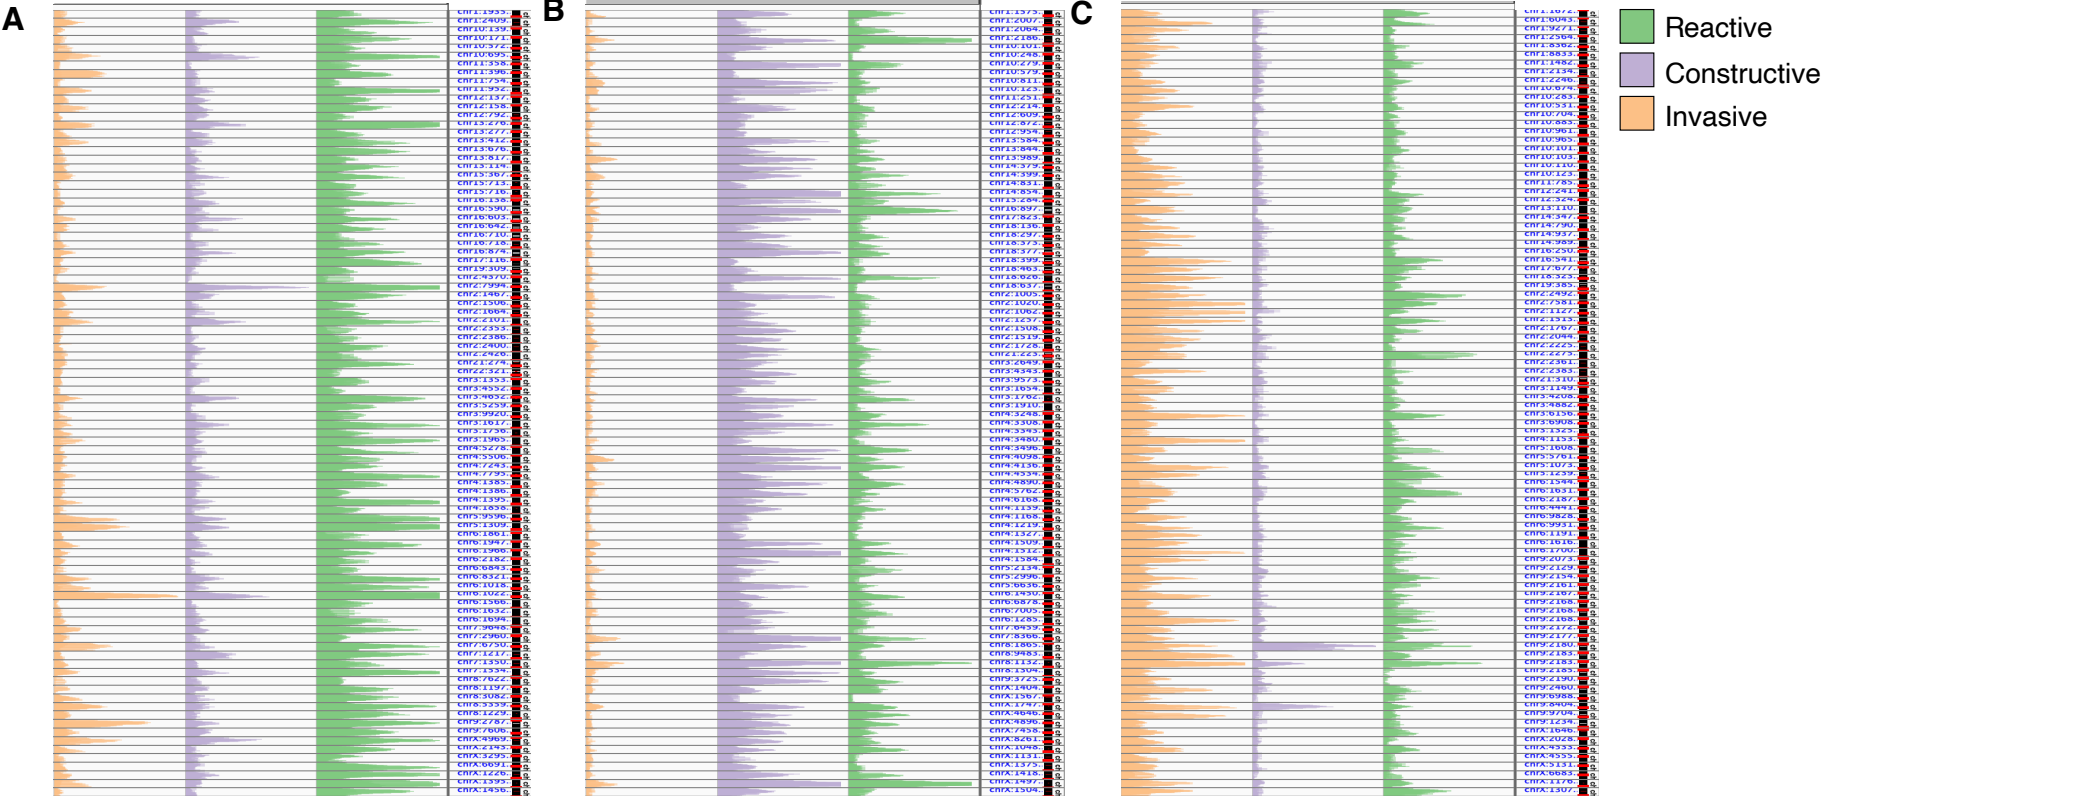

Supplement: supp [file elife-64090-supp-v1.zip]

Figure 1-figure supplement 1

A

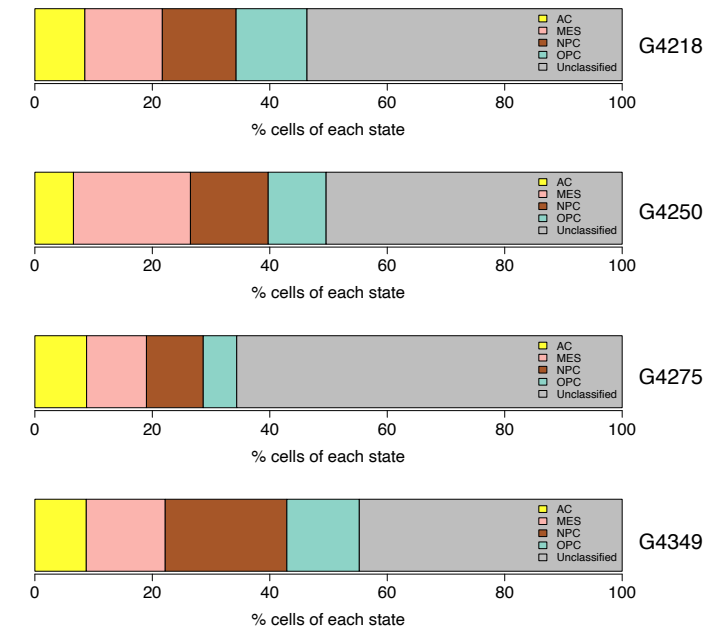

B

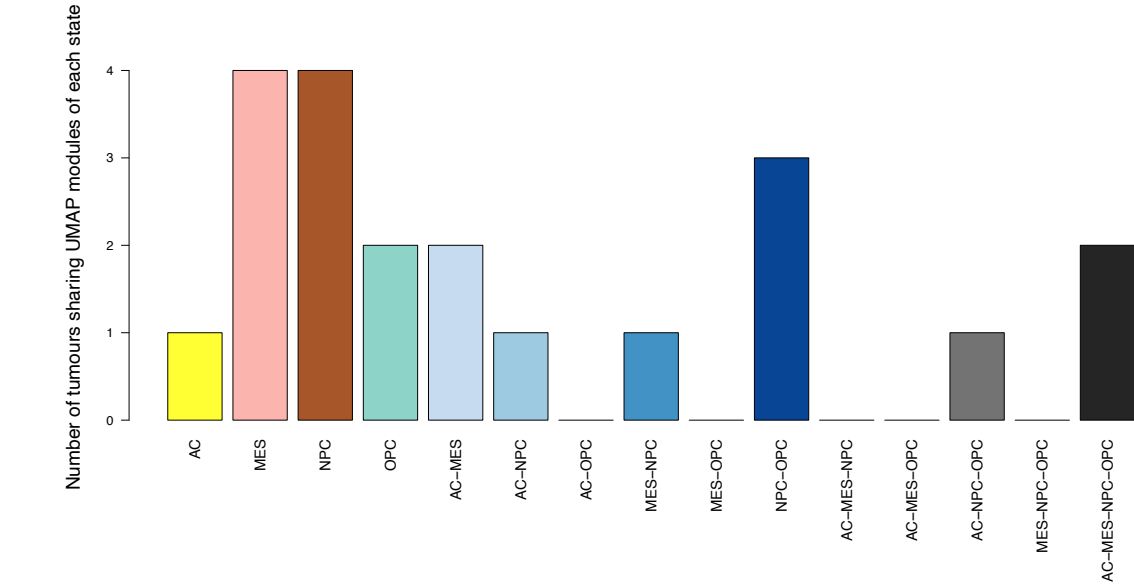

Supplement: supp [file elife-64090-supp-v1.zip]

Figure 4-figure supplement 1

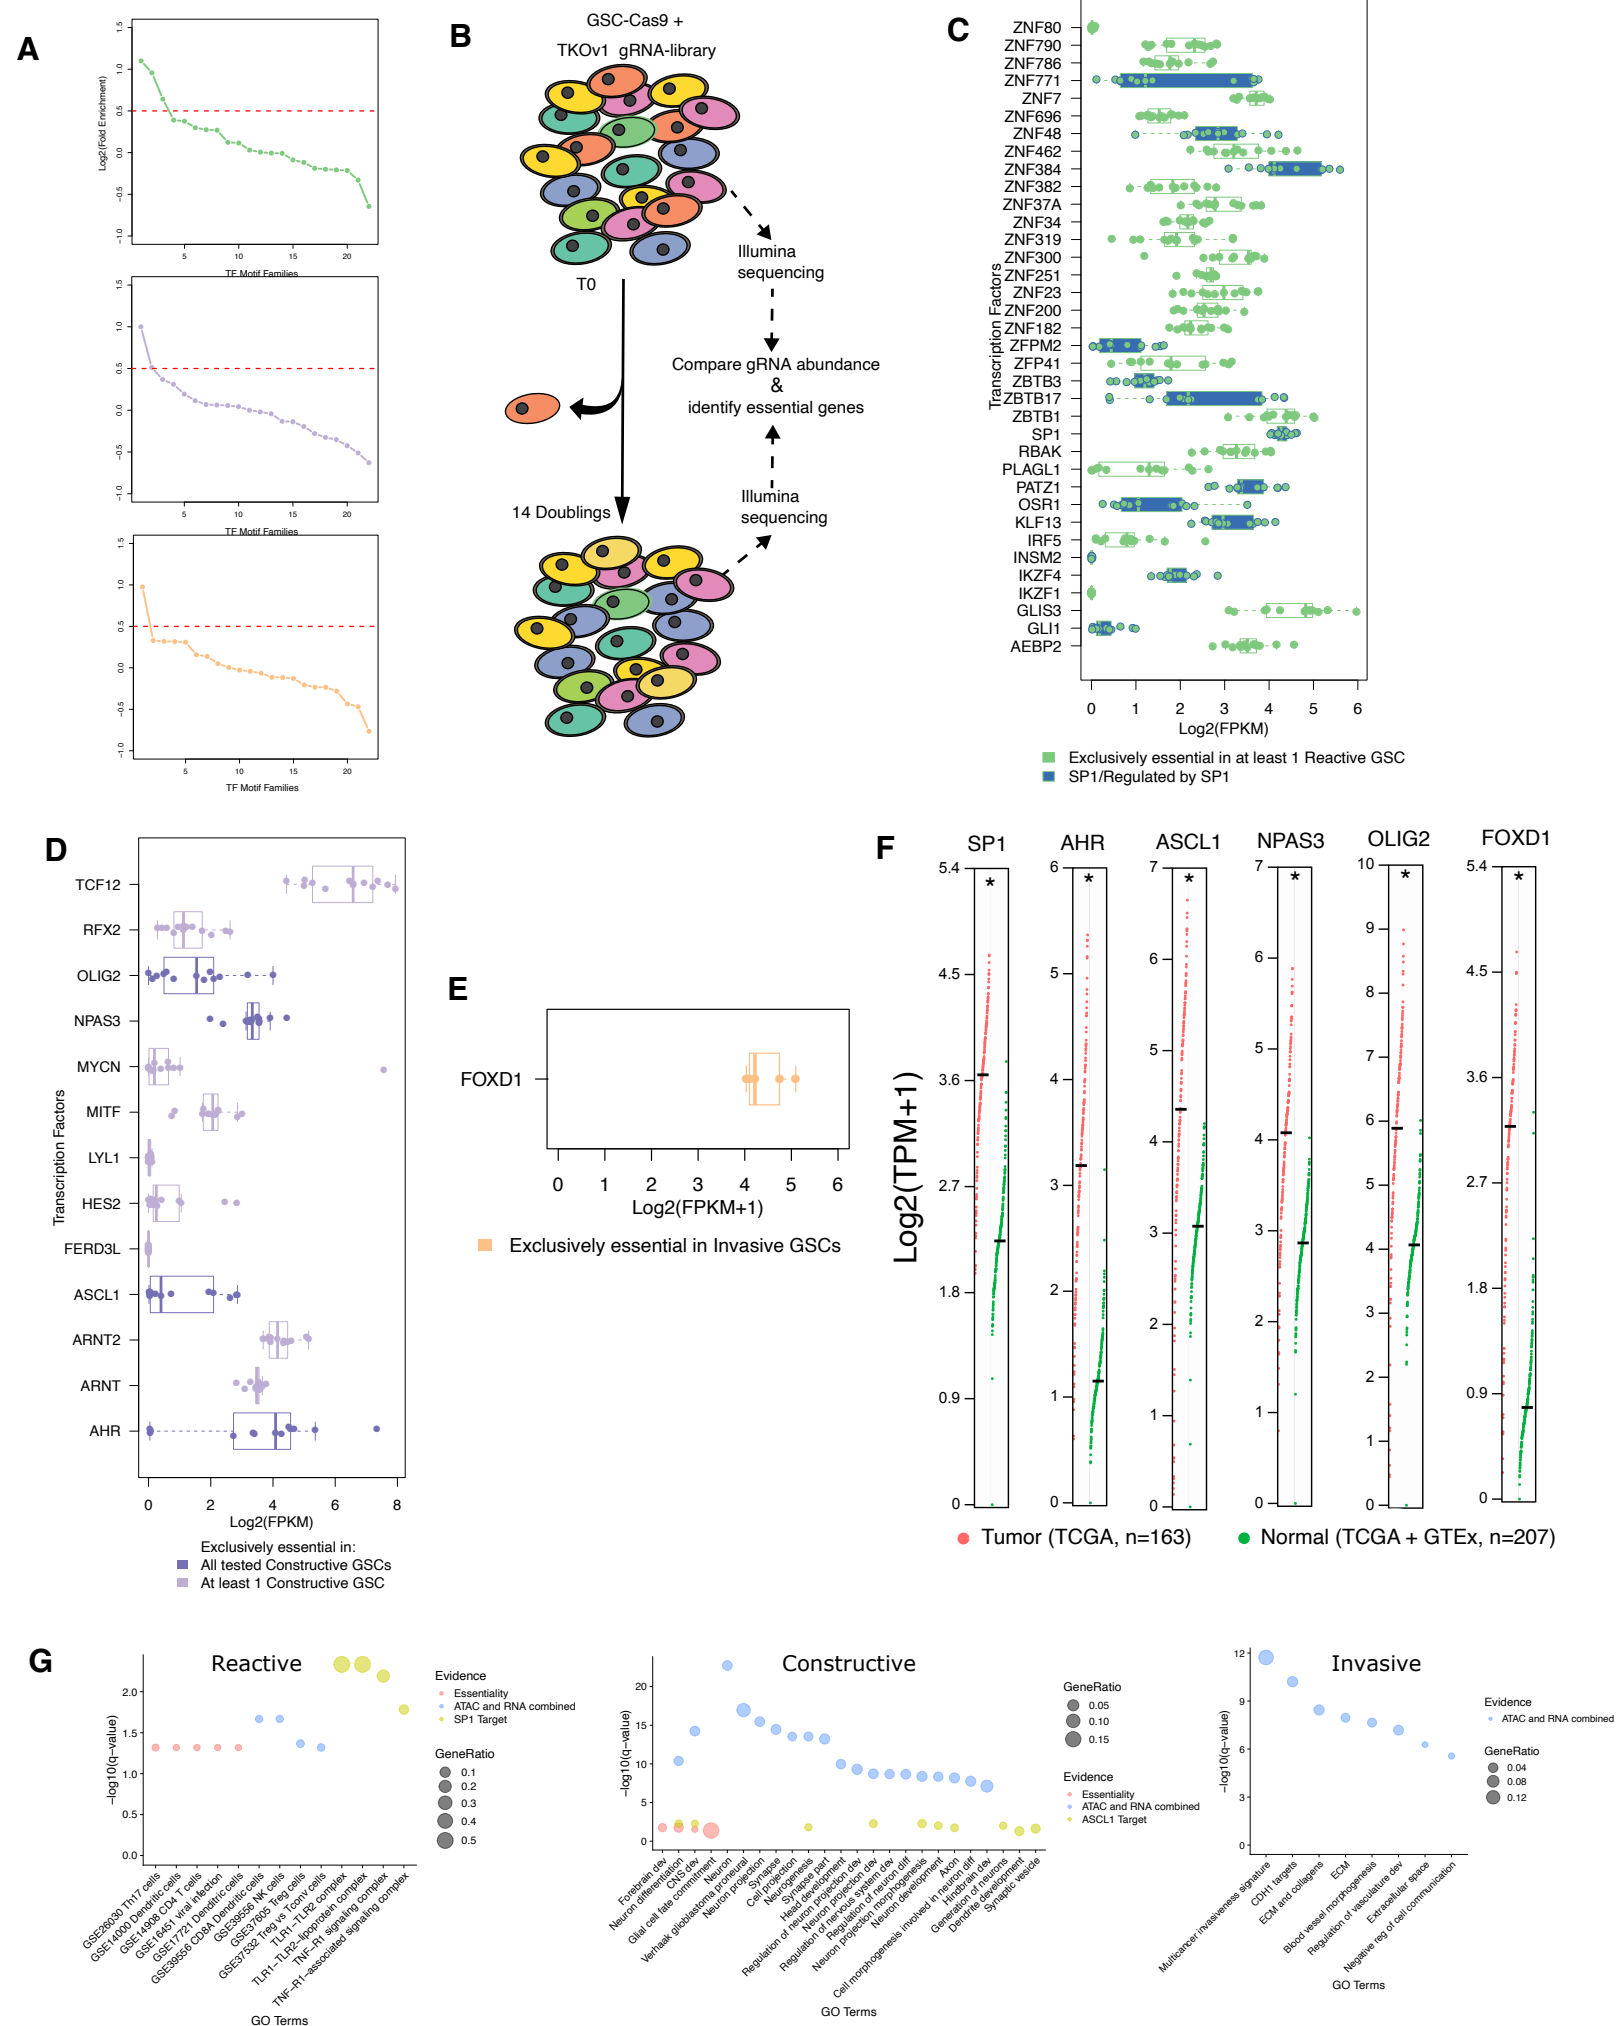

Supplement: supp [file elife-64090-supp-v1.zip]

Figure 5-figure supplement 1

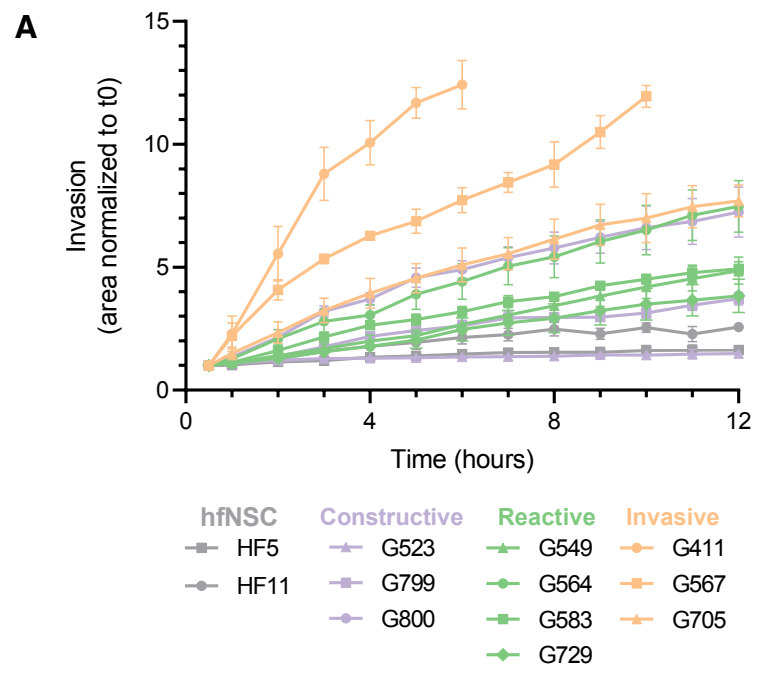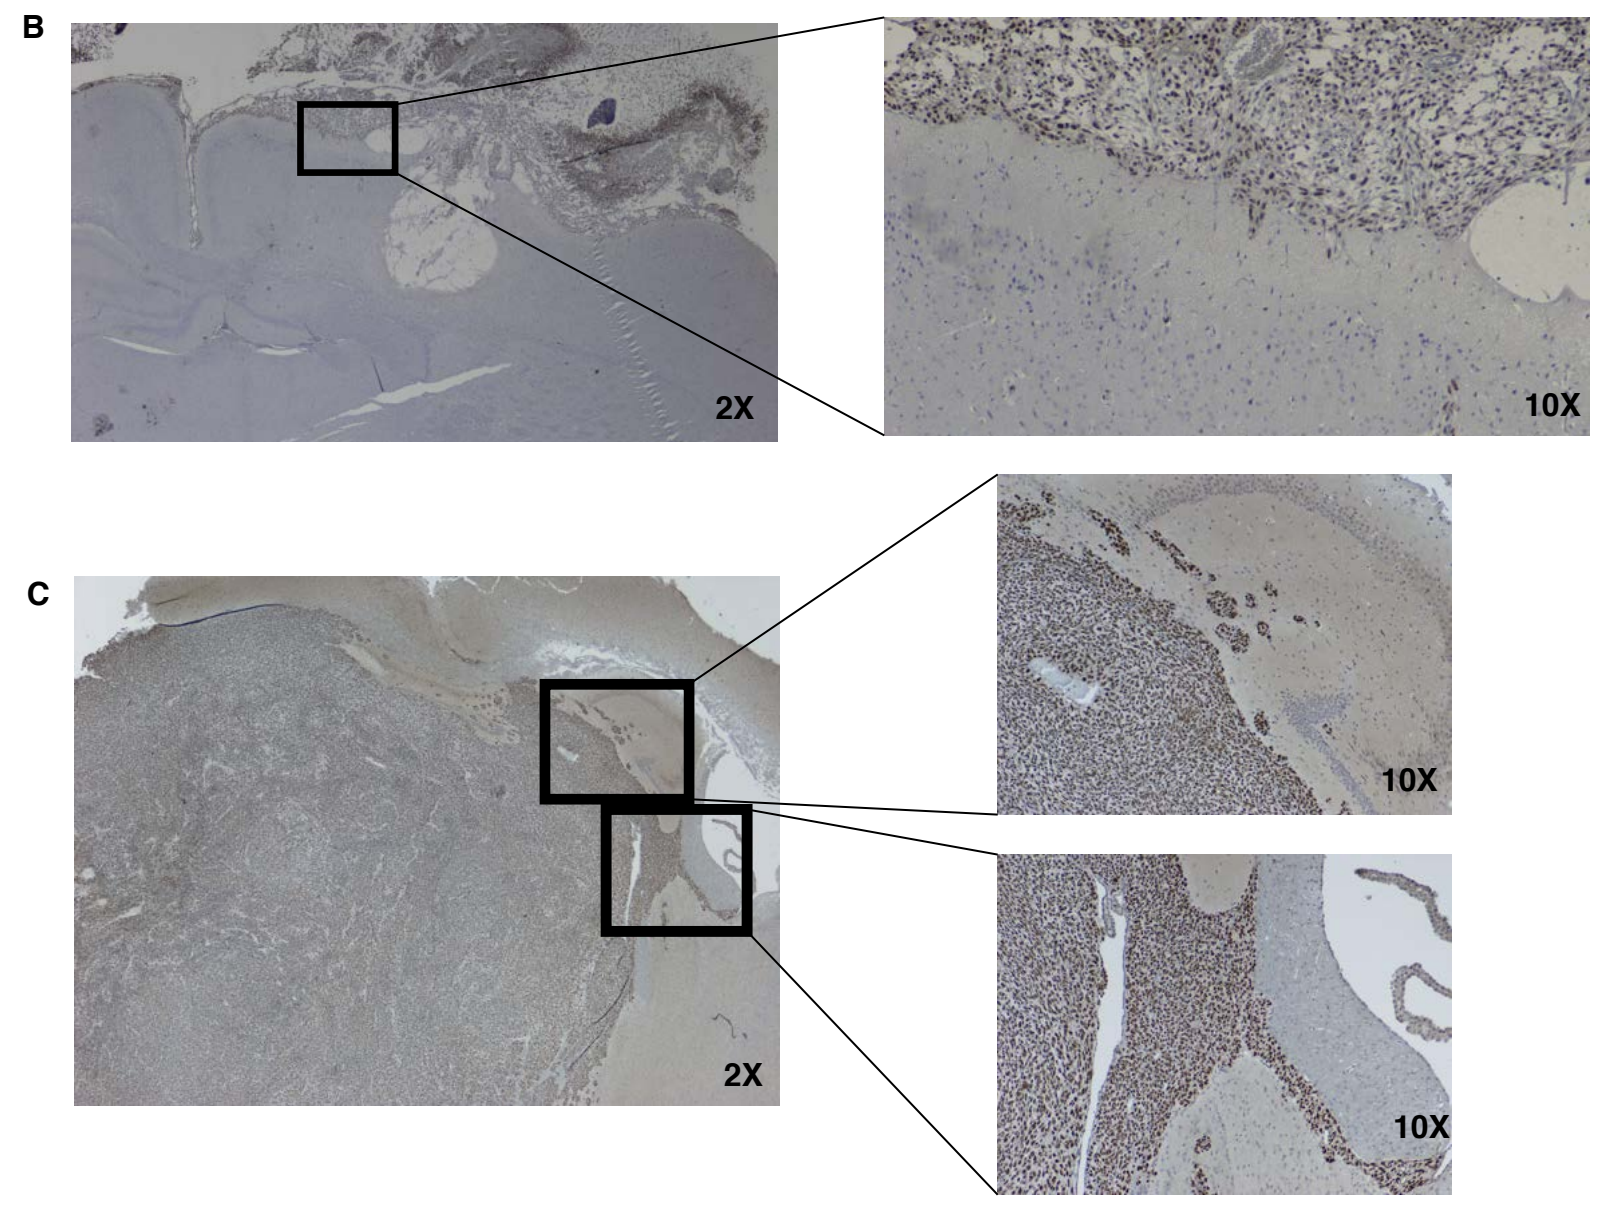

Supplement: supp [file elife-64090-supp-v1.zip]
